# Supplementary material
Source: PubMed Central journal article supplement (PMC9685550)
Supplement: jamaoncol-e225486-s003.pdf [file jamaoncol-e225486-s003.pdf]

## Data Sharing Statement

Unger. Effectiveness of Adjuvant Pembrolizumab vs High-Dose Interferon or Ipilimumab for Quality-of-Life Outcomes in Patients With Resected Melanoma. *JAMA Oncol.* Published November 23, 2022. doi:10.1001/jamaoncol.2022.5486

### Data

**Data available:** Yes

**Data types:** Deidentified participant data, Data dictionary

**How to access data:** Data pertinent to this analysis will be made available upon request for researchers whose proposed use of the data has been approved by the SWOG Cancer Research Network.

**When available:** beginning date: 01-01-2023

### Supporting Documents

**Document types:** None

### Additional Information

**Who can access the data:** researchers whose proposed use of the data has been approved

**Types of analyses:** for any purpose

**Mechanisms of data availability:** after approval of a proposal and with a signed data use agreement
